# Supplementary material
Source: Springer Nature journal article supplement (https://www.springermedizin.de/resource/supplementary/12877_2009_139_MOESM1_ESM.pdf/9441374)
Supplement: MOESM1 [file 9441374]

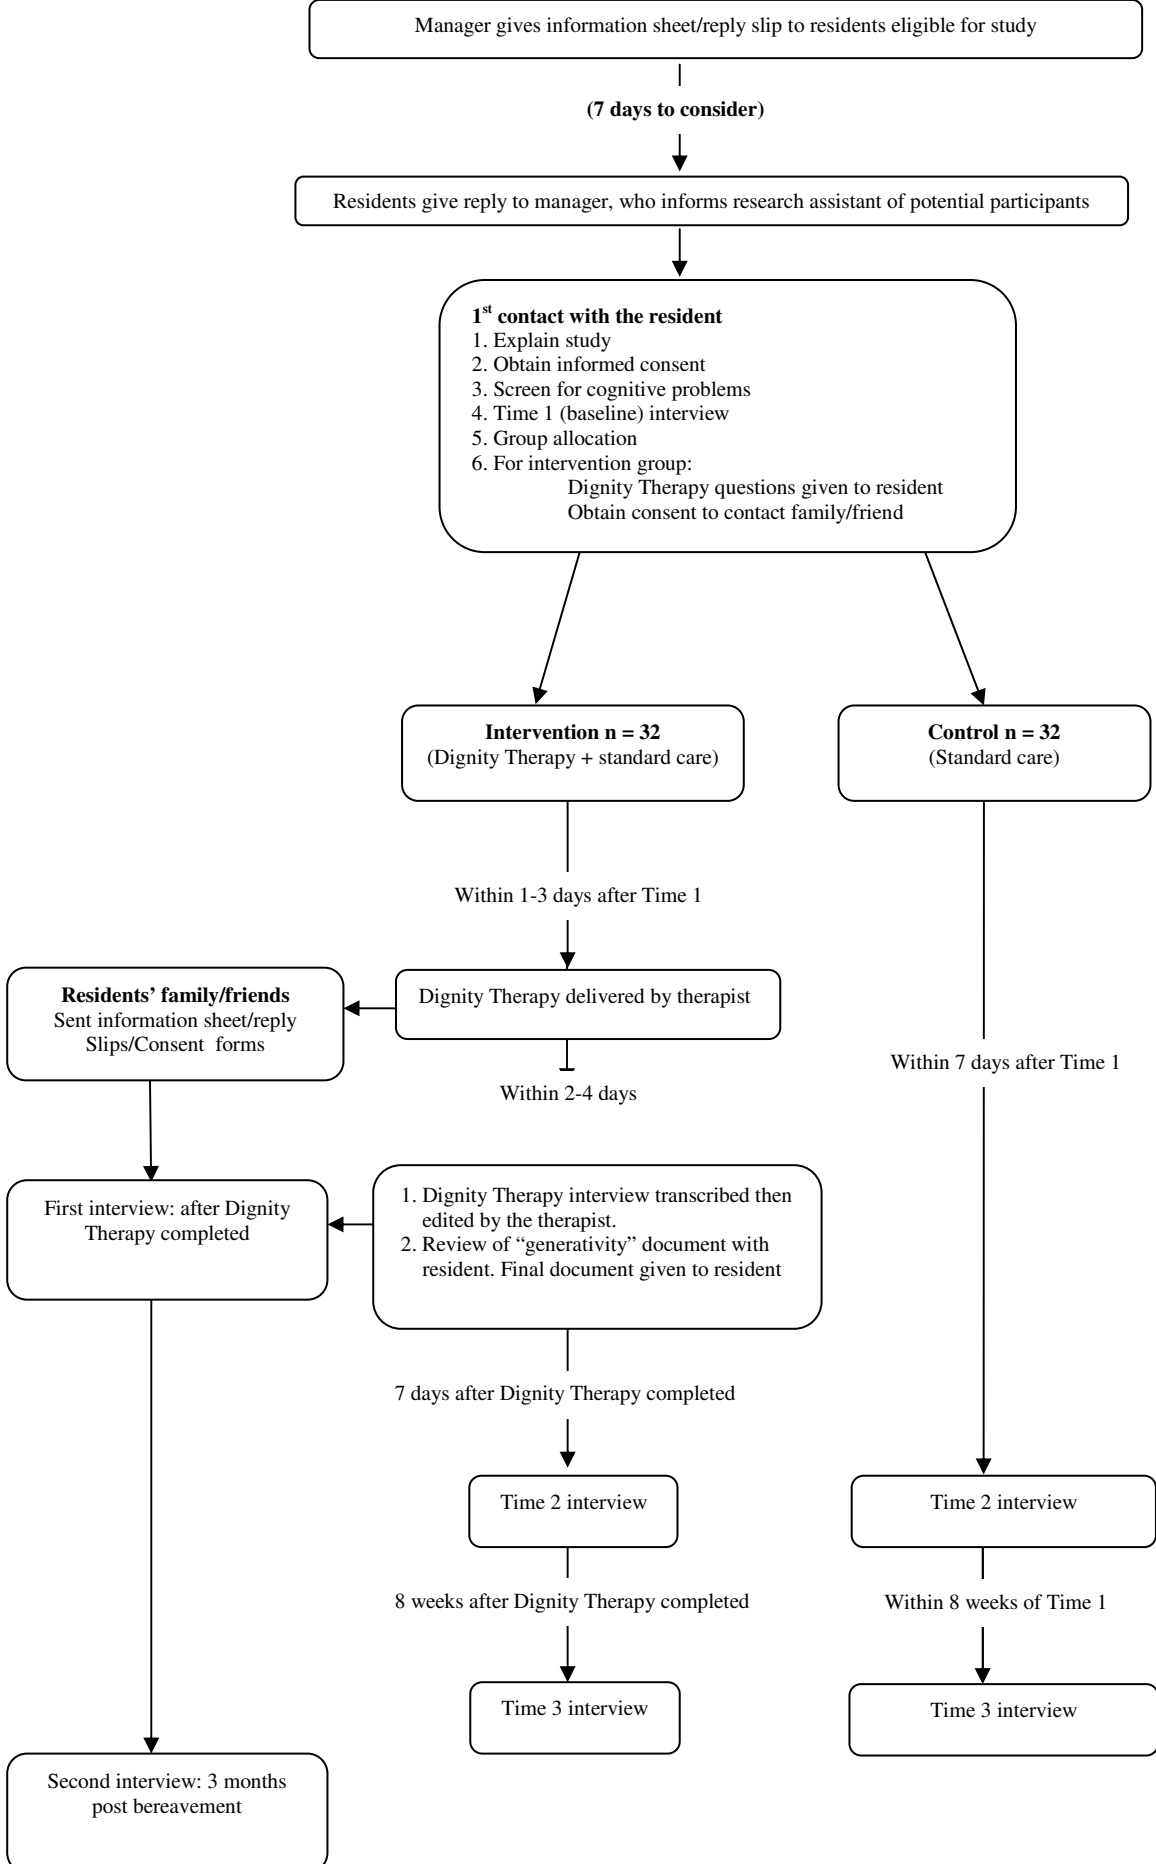

Manager gives information sheet/reply slip to residents eligible for study

(7 days to consider)

Residents give reply to manager, who informs research assistant of potential participants

**1<sup>st</sup> contact with the resident**  
 1. Explain study  
 2. Obtain informed consent  
 3. Screen for cognitive problems  
 4. Time 1 (baseline) interview  
 5. Group allocation  
 6. For intervention group:  
 Dignity Therapy questions given to resident  
 Obtain consent to contact family/friend

**Intervention n = 32**  
 (Dignity Therapy + standard care)

**Control n = 32**  
 (Standard care)

Within 1-3 days after Time 1

Dignity Therapy delivered by therapist

Within 7 days after Time 1

Within 2-4 days

**Residents' family/friends**  
 Sent information sheet/reply Slips/Consent forms

First interview: after Dignity Therapy completed

1. Dignity Therapy interview transcribed then edited by the therapist.  
 2. Review of "generativity" document with resident. Final document given to resident

Time 2 interview

7 days after Dignity Therapy completed

Time 2 interview

Within 8 weeks of Time 1

8 weeks after Dignity Therapy completed

Time 3 interview

Time 3 interview

Second interview: 3 months post bereavement
